# Supplementary material for: Integrated Action of Autophagy and Adipose Tissue Triglyceride Lipase Ameliorates Diet-Induced Hepatic Steatosis in Liver-Specific PLIN2 Knockout Mice
Source: MDPI journal article supplement (doi:10.3390/cells10051016), 2021-04-25
Supplement: s1 [file s1]

| Name                             | Lipid Number | 45% HFD | 60% HFD | WTD   | LFD   |
|----------------------------------|--------------|---------|---------|-------|-------|
| Butyric Acid                     | C4           | 0.00    | 0.00    | 1.42  | 0.21  |
| Caproic Acid                     | C6           | 0.00    | 0.00    | 0.84  | 0.13  |
| Caprylic Acid                    | C8           | 0.00    | 0.00    | 0.49  | 0.07  |
| Capric Acid                      | C10          | 0.00    | 0.00    | 1.11  | 0.17  |
| Lauric Acid                      | C12          | 0.03    | 0.04    | 1.24  | 0.19  |
| Myristic Acid                    | C14          | 0.48    | 0.66    | 4.44  | 0.67  |
| Myristoleic Acid                 | C14:1        | 0.00    | 0.00    | 0.67  | 0.10  |
| Pentadecylic Acid                | C15          | 0.00    | 0.00    | 0.00  | 0.00  |
| Palmitic Acid                    | C16          | 8.78    | 11.91   | 12.08 | 2.20  |
| Palmitoleic Acid                 | C16:1        | 0.64    | 0.88    | 1.02  | 0.16  |
| Heptadecanoic Acid               | C17          | 0.12    | 0.17    | 0.00  | 0.00  |
| Octadecanoic Acid                | C18          | 4.70    | 6.41    | 5.54  | 0.98  |
| Oleatic Acid                     | C18:1        | 15.12   | 20.38   | 12.16 | 2.69  |
| Linoleic Acid                    | C18:2        | 10.88   | 13.93   | 3.32  | 2.45  |
| $\alpha$ -Linolenic Acid         | C18:3        | 0.89    | 1.08    | 0.95  | 0.42  |
| Stearidonic Acid                 | C18:4        | 0.00    | 0.00    | 0.00  | 0.00  |
| Eicosanoic Acid                  | C20          | 0.10    | 0.13    | 0.44  | 0.08  |
| Gondoic Acid                     | C20:1        | 0.27    | 0.37    | 0.01  | 0.01  |
| Eicosadienoic Acid               | C20:2        | 0.31    | 0.42    | 0.00  | 0.00  |
| Dihomo- $\gamma$ -linolenic Acid | C20:3        | 0.10    | 0.14    | 0.00  | 0.00  |
| Aracidonic Acid                  | C20:4        | 0.10    | 0.14    | 0.00  | 0.00  |
| Eicosapentaenoic Acid (EPA)      | C20:5        | 0.00    | 0.00    | 0.00  | 0.00  |
| Heneicosapentaenoic Acid         | C21:5        | 0.00    | 0.00    | 0.00  | 0.00  |
| Docosanoic Acid                  | C22          | 0.01    | 0.01    | 0.01  | 0.01  |
| Docosatetraenoic Acid            | C22:4        | 0.00    | 0.00    | 0.00  | 0.00  |
| Docosapentaenoic Acid            | C22:5        | 0.03    | 0.04    | 0.00  | 0.00  |
| Decosahexaenoic Acid (DHA)       | C22:6        | 0.00    | 0.00    | 0.00  | 0.00  |
| Tetracosanoic Acid               | C24          | 0.01    | 0.01    | 0.01  | 0.01  |
|                                  |              |         |         |       |       |
| Saturated Fat (% Total Fat)      |              | 33.44   | 34.09   | 60.38 | 44.7  |
| MUFA (% Total Fat)               |              | 37.63   | 38.13   | 30.29 | 28.07 |
| PUFA (% Total Fat)               |              | 28.93   | 27.78   | 9.32  | 27.23 |
|                                  |              |         |         |       |       |
| Saturated Fat (% Total Energy)   |              | 14.24   | 19.33   | 23.91 | 4.08  |
| MUFA (% Total Energy)            |              | 16.02   | 21.62   | 12.00 | 2.56  |
| PUFA (% Total Energy)            |              | 12.32   | 15.75   | 3.69  | 2.49  |
|                                  |              |         |         |       |       |
| Total Fat (% Total Energy)       |              | 42.58   | 56.71   | 39.61 | 9.13  |

**Table S2. Fatty acid composition of experimental diets as compared to common high fat diets.** All diets formulated by Research Diets, 45% high fat diet (HFD), D12451; 60% HFD, D12492, western-type diet (WTD), D15102305; low fat diet (LFD), D15102305.
