# Supplementary material for: Integrated Action of Autophagy and Adipose Tissue Triglyceride Lipase Ameliorates Diet-Induced Hepatic Steatosis in Liver-Specific PLIN2 Knockout Mice
Source: MDPI journal article supplement (doi:10.3390/cells10051016), 2021-04-25
Supplement: s1 [file s1]

| Name     | Forward Sequence         | Reverse Sequence           |
|----------|--------------------------|----------------------------|
| ACC1     | CATCACCATCAGCCTGGTTACA   | ACTGTGTACGCTCTTCGGCAT      |
| ACOX1    | ACGCCACTTCCTTGCTCTTC     | AGATTGGTAGAAATTGCTGCAAAA   |
| ATGL     | TGTGGCCTCATTCTCCTAC      | TCGTGGATGTTGGTGGAGCT       |
| Cideb    | CATCACAGACACGGAAGGCTC    | CAATGGCCTGCTAAGGTCAGT      |
| COX2     | CACAGCCTACCAAAACAGCCA    | GCTCAGTTGAACGCCTTTTGA      |
| CPT1a    | AGTGGCCTCACAGACTCC       | GCCCATGTTGTACAGCTTCC       |
| DGAT1    | TCACCACACACCAATTCAGG     | GACGGCTACTGGGATCTGA        |
| DGAT2    | CGCAGCGAAAACAAGAATAA     | GAAGATGTCTTGGAGGGCTG       |
| FASN     | GCTGCGGAAACTTCAGGAAAT    | AGAGACGTGTCACTCCTGGACTT    |
| FSP-27   | ATTGTGCCATCTTCCTCCAG     | GTCGTGTTAGCACCGCAGAT       |
| HSL      | GGAGCACTACAAACGCAACGA    | TCGGCCACCGGTAAAGAG         |
| IL-1B    | CTGGTGTGTGACGTTCCCAT     | CCGACAGCACGAGGCTTT         |
| IL-6     | CCCCAATTTCCAATGCTCTCC    | CGCACTAGGTTTGCCGAGTA       |
| Map1lc3a | GACCGCTGTAAGGAGGTGC      | CTTGACCAACTCGCTCATGTTA     |
| Map1lc3b | TTATAGAGCGATACAAGGGGGAG  | CGCCGTCTGATTATCTTGATGAG    |
| MGAT1    | GAGTAACGGGCCGGTTTCA      | AGACATTGCCACCTCCATCCT      |
| Mttp     | AGTGCAGTTCTCACAGTACCCGTT | AGCATATCGTTCTGGTGGGAAGGGA  |
| PLIN1    | CAACAGCACCAAAGAAGCCC     | GCACCCTGTACACCCTTCTC       |
| PLIN2    | CAATTTGTGGCTCCAGCTTC     | CCCGTATTTGAGATCCGTGT       |
| PLIN3    | TGGTGATTAGCGGAGTGGAC     | GTAGTTCTGCTCCTGTCGCT       |
| PLIN4    | GCATCTTCACTGCTGGTCAC     | CTGCCCCCTCATCTAAAGTG       |
| PLIN5    | CCGTGTCCAGTGCTTACAAC     | AGGGCAGCTTCTCTTCCAAT       |
| SCD1     | CCGGAGACCCCTTAGATCGA     | TAGCCTGTAAAAGATTTCTGCAAACC |
| Sqstm1   | AGGATGGGGACTTGGTTGC      | TCACAGATCACATTGGGGTGC      |
| SREBP1c  | GGAGGGGTAGGGCCAACGGCCT   | CATGTCTTCGAAAGTGCAATCC     |
| TNF-a    | ATGGGCTTTCCGAATTCAA      | GAGGCAACCTGACCACTCTC       |

**Table S3.** Primer Sequences
