# Supplementary material for: Integrated Action of Autophagy and Adipose Tissue Triglyceride Lipase Ameliorates Diet-Induced Hepatic Steatosis in Liver-Specific PLIN2 Knockout Mice
Source: MDPI journal article supplement (doi:10.3390/cells10051016), 2021-04-25
Supplement: s1 [file s1]

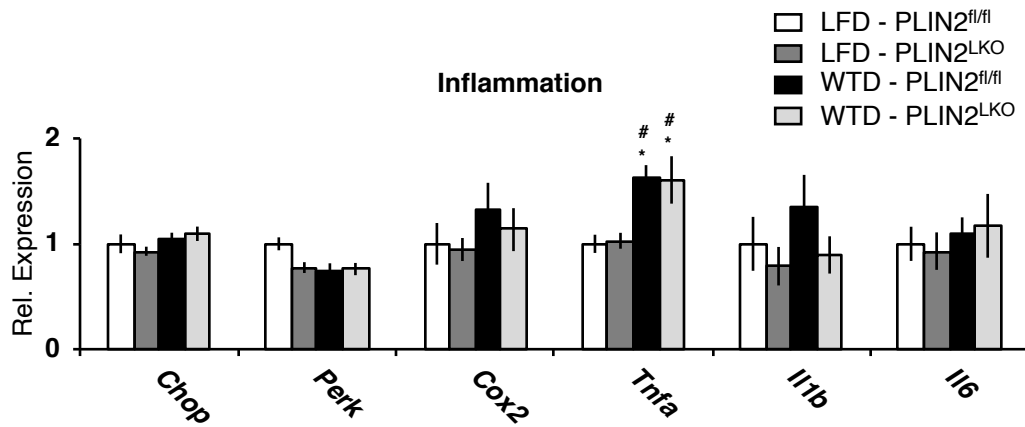

**Figure S1. Hepatic specific deficiency of PLIN2 does not alter expression of inflammatory genes in liver after 12 weeks of western type diet feeding.** Gene expression as measured by qPCR in livers of 6 hr fasted mice fed low fat (LFD) or western-type (WTD) diet treatment for 12 weeks. n=10-13/group. Data are presented as mean  $\pm$  SEM. \* $p \leq 0.05$  vs LFD-PLIN2<sup>fl/fl</sup>, # $p \leq 0.05$  vs LFD-PLIN2<sup>LKO</sup>, @  $p \leq 0.05$  vs WTD-PLIN2<sup>fl/fl</sup> as determined by two-way ANOVA and Tukey's post-hoc analysis.
