# Supplementary material for: Integrated Action of Autophagy and Adipose Tissue Triglyceride Lipase Ameliorates Diet-Induced Hepatic Steatosis in Liver-Specific PLIN2 Knockout Mice
Source: MDPI journal article supplement (doi:10.3390/cells10051016), 2021-04-25
Supplement: s1 [file s1]

| <b>Macronutrient Composition (g/kg)</b> |                |                |            |            |
|-----------------------------------------|----------------|----------------|------------|------------|
|                                         | <b>45% HFD</b> | <b>60% HFD</b> | <b>WTD</b> | <b>LFD</b> |
| Protein                                 | 24.00          | 26.20          | 20.10      | 16.30      |
| Fat                                     | 24.00          | 34.90          | 23.70      | 4.20       |
| Carbohydrate                            | 41.00          | 26.30          | 45.90      | 71.10      |
| Cholesterol (ppm)*                      | 192.00         | 275.00         | 593.00     | 97.00      |
| Fiber                                   | 50.00          | 50.00          | 50.00      | 50.00      |

| <b>Ingredients (g/kg)</b> |                |                |            |            |
|---------------------------|----------------|----------------|------------|------------|
|                           | <b>45% HFD</b> | <b>60% HFD</b> | <b>WTD</b> | <b>LFD</b> |
| Sucrose                   | 172.80         | 68.80          | 340.00     | 0.00       |
| Corn Starch               | 72.80          | 0.00           | 56.86      | 701.00     |
| Maltodextrin              | 100.00         | 500.00         | 60.00      | 150.00     |
| Casein - Vitamin Tested   | 200.00         | 200.00         | 195.00     | 195.00     |
| Milk Fat                  | x              | x              | 210.00     | 30.00      |
| Lard                      | 177.50         | 245.00         | x          | x          |
| Soybean Oil               | 25.00          | 25.00          | 20.00      | 20.00      |
| Corn Oil                  | x              | x              | 0.00       | 0.00       |
| Powdered Cellulose        | 50.00          | 50.00          | 50.00      | 50.00      |
| AIN-93G Mineral Mix/Fiber | x              | x              | 35.00      | 35.00      |
| AIN-93 Vitamin Mix/ Fiber | x              | x              | 10.00      | 10.00      |
| Calcium Carbonate         | 5.50           | 5.50           | 0.00       | 0.00       |
| DL-Methionine             | x              | x              | 0.00       | 0.00       |
| L-cysteine                | 3.00           | 3.00           | 3.00       | 3.00       |
| Choline Bitartate         | 2.00           | 2.00           | 3.00       | 3.00       |
| Ethoxyquin                | x              | x              | 0.00       | 0.00       |
| t-Butylhydroquinone       | x              | x              | 0.04       | 0.04       |

| <b>Macronutrient Composition (%kcal)</b> |                |                |            |            |
|------------------------------------------|----------------|----------------|------------|------------|
|                                          | <b>45% HFD</b> | <b>60% HFD</b> | <b>WTD</b> | <b>LFD</b> |
| Protein                                  | 20.00          | 20.00          | 17.00      | 17.00      |
| Fat                                      | 45.00          | 60.00          | 39.00      | 10.00      |
| Carbohydrate                             | 35.00          | 20.00          | 44.00      | 73.00      |

**Table S1.** Nutrient and ingredient composition of experimental diets as compared to common high fat diets. All diets formulated by Research Diets, 45% high fat diet (HFD), D12451; 60% HFD, D12492, western-type diet (WTD), D15102305; low fat diet (LFD), D15102305.
