# Supplementary material for: Integrated Action of Autophagy and Adipose Tissue Triglyceride Lipase Ameliorates Diet-Induced Hepatic Steatosis in Liver-Specific PLIN2 Knockout Mice
Source: MDPI journal article supplement (doi:10.3390/cells10051016), 2021-04-25
Supplement: s1 [file s1]

| Group                        | Steatosis Grade |         |         |         |      |
|------------------------------|-----------------|---------|---------|---------|------|
|                              | 0               | 1       | 2       | 3       | NASH |
| LFD - PLIN2 <sup>fl/fl</sup> | 0               | 67% (4) | 33% (2) | 0       | 0    |
| LFD - PLIN2 <sup>LKO</sup>   | 0               | 83% (5) | 17% (1) | 0       | 0    |
| WTD - PLIN2 <sup>fl/fl</sup> | 0               | 0       | 33% (2) | 67% (4) | 0    |
| WTD - PLIN2 <sup>LKO</sup>   | 0               | 17% (1) | 50% (3) | 33% (2) | 0    |

**Table S4. Reduced prevalence of Grade 3 steatosis in western-type diet fed PLIN2<sup>LKO</sup> livers.** Histopathological scoring of the degree of steatosis in liver sections collected from mice from 12 weeks of LFD or WTD feeding n=6. Grades represent the percentage of the liver section that was occupied by fat at 100 × magnification in 20 fields. Grade 0 = < 5% view; Grade 1 = 5 to 25%; Grade 2 = 26 to 50%; Grade 3 = 51 to 75%; Grade 4 = 76% to 100%. Inflammatory foci and ballooning degeneration of hepatocytes were also examined with prevalence reported under NASH column. Data are presented as the percentage of animals from the sample group presenting with a given steatosis grade with number of animals shown in parentheses.
